# Supplementary material for: Enabling the recirculation of leukocytes in a high-throughput microphysiological system (MPS) to study immune cell-vascular tissue interactions
Source: Royal Society of Chemistry journal article supplement (doi:10.1039/d5lc01001b), 2026-01-01
Supplement: d5lc01001b1.pdf [file d5lc01001b1.pdf]

Enabling the recirculation of leukocytes in a high-throughput microphysiological system (MPS) to study  
immune cell-vascular tissue interactions

Tyler Gerhardson, Nerses J. Haroutunian, Ryan Dubay, Joseph N. Urban, Anthony Quinnert, Brett C.  
Isenberg, Samuel H. Kann, Halee Kim, Robert Gaibler, Hesham Azizgolshani, Elizabeth L. Wiellette, Corin  
Williams

Supplementary Information

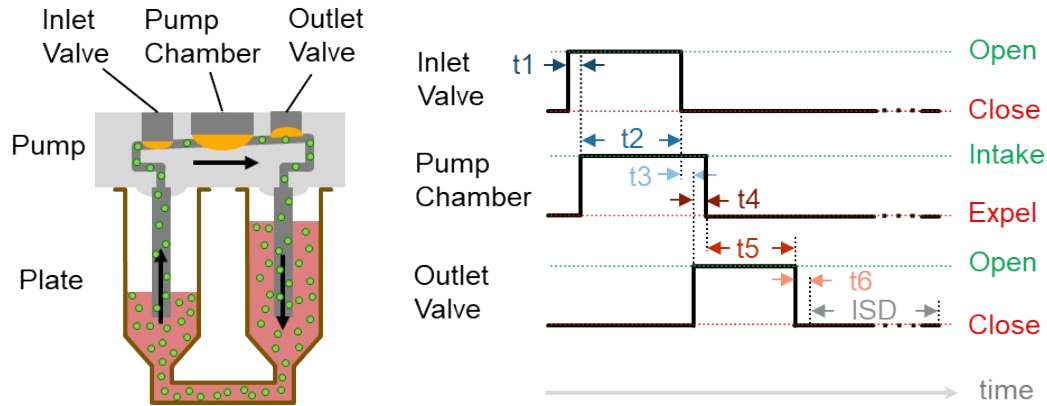

Figure S1. **Pump event timing diagram.** Left: Schematic of the flow circuit and pump features. Right: The timing diagram shows the layout of parameters  $t_1 - t_6$  and interstroke delay (ISD) used to actuate the pump. Table S3 in the supplemental section provides the values for specific configurations used in this study.

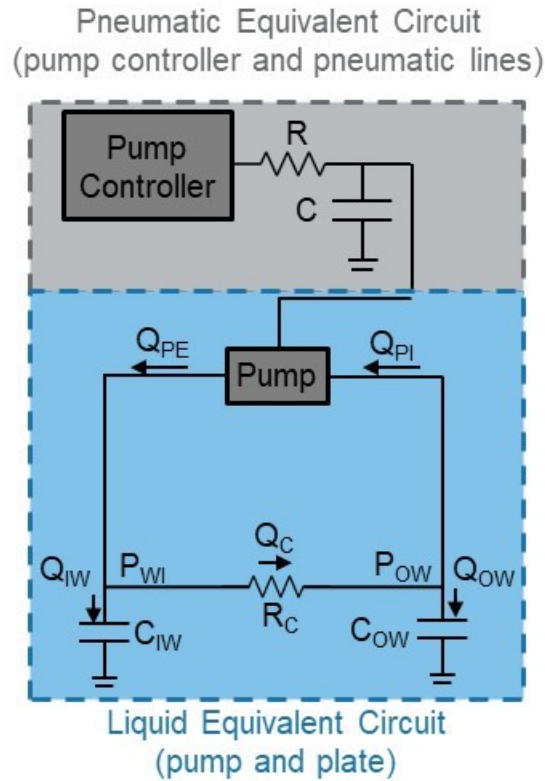

Figure S2. **System equivalent circuit for a single pump device and plate channel of PREDICT96.** The fluid equivalent circuit used to derive the analytical model of flow through PREDICT96 plate channels driven by the pump.  $Q_{PI}$  and  $Q_{PE}$  are the respective intake and expulsion flow rates produced by the pump.  $Q_{IW}$  and  $Q_{OW}$  are the respective flow rates into the inlet well and out of the outlet well.  $C_{IW}$  and  $C_{OW}$  are the respective capacitances of the inlet well and outlet well.  $P_{IW}$  and  $P_{OW}$  are the respective hydrostatic pressures at the inlet well and outlet well.  $Q_C$  is the flow rate through the tissue model channel with resistance  $R_C$ .

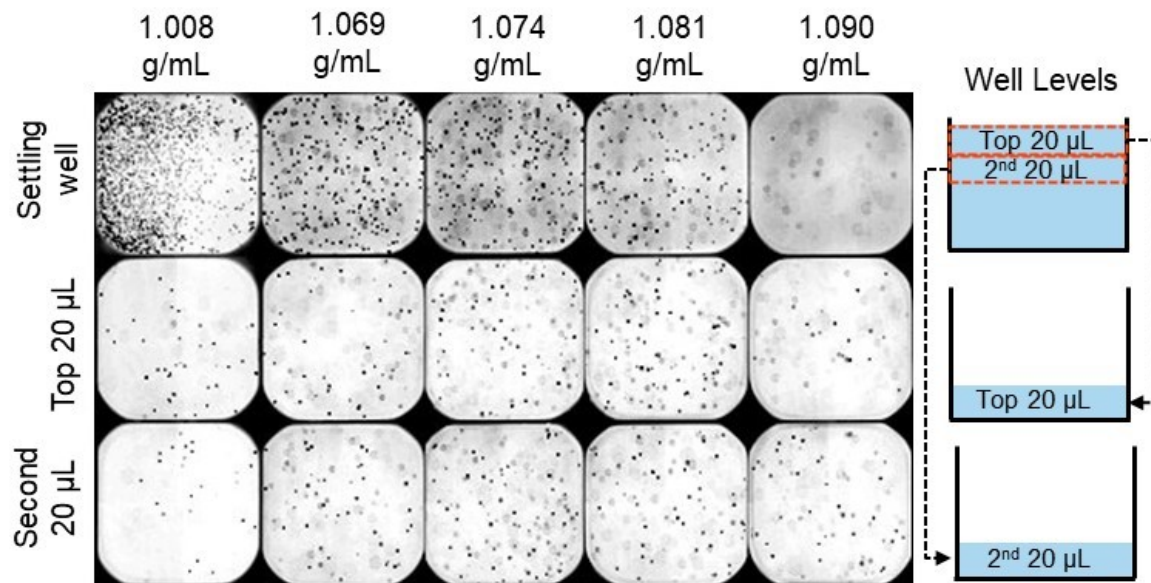

Figure S3. **Neutrophil distribution across the height of the neutrally buoyant suspensions after 2 h.** Representative contrast-adjusted images of neutrophil suspensions sampled from different fluid heights in a 384 well plate after 2 h. All images were acquired at the bottom of the wells. The top row of images shows the original suspension samples after 2 h. 20  $\mu$ L aliquots of neutrophil suspensions were sequentially sampled from the top of the wells in the first row. The middle row shows the first 20  $\mu$ L aliquot and the bottom row shows the second 20  $\mu$ L aliquot. The different fluid densities tested are shown by column. For a given density (column), the more evenly the neutrophils are distributed across fluid heights (rows), the more homogenous the suspension after 2 h.

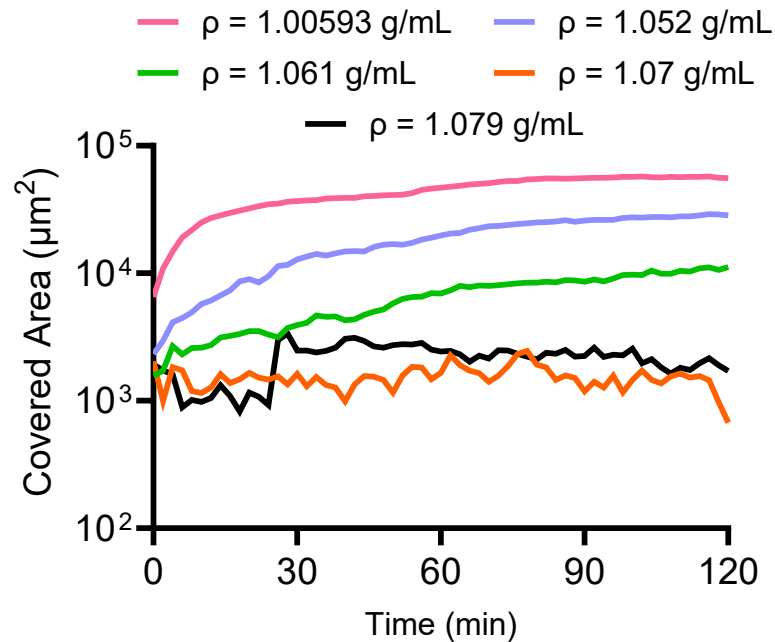

Figure S4. **Neutrally buoyant media experiments for primary human monocytes.** The area coverage on the bottom of a well measured overtime for monocytes in media suspensions with different densities (HBSS and Optiprep™).

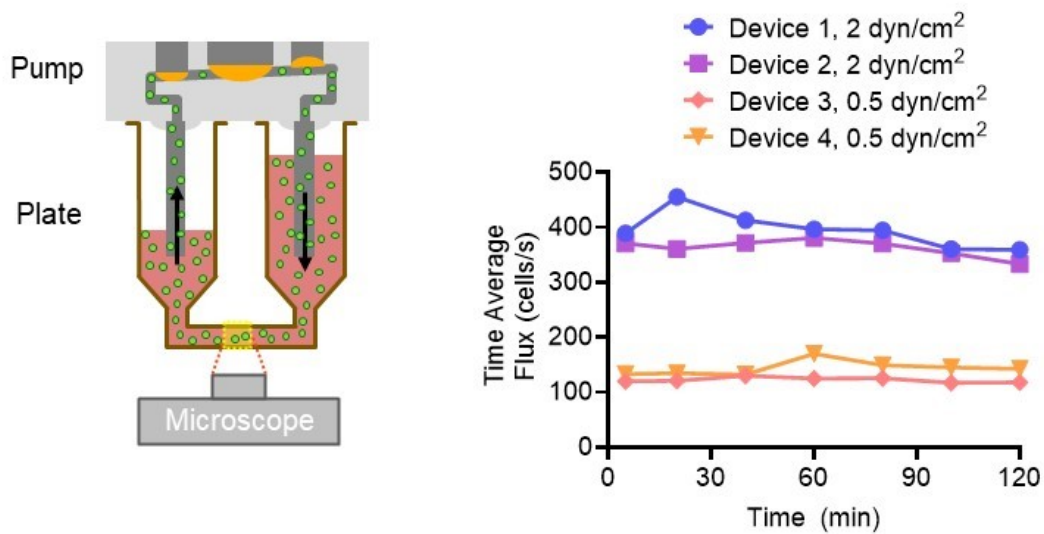

Figure S5. **Neutrophil flux was stable through microfluidic tissue channels of PREDICT96 during recirculation.** The flux of neutrophils through  $N = 2$  individual PREDICT96 devices at two different channel shows stable neutrophil flux over 2 h of recirculation.

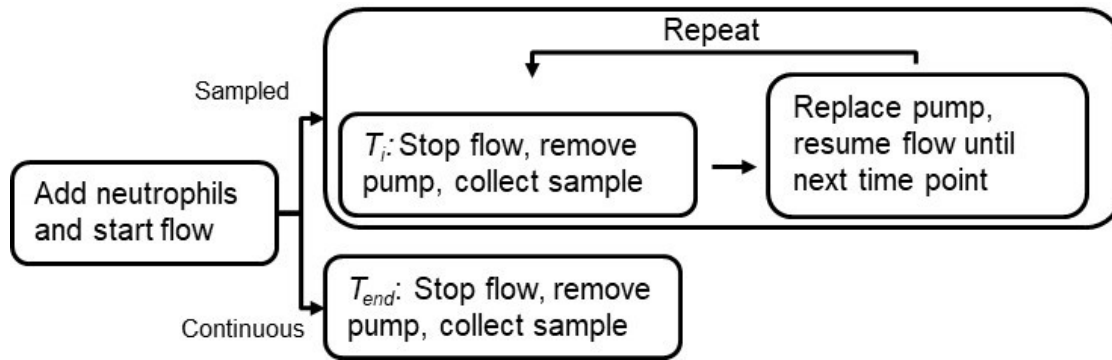

Figure S6. **Schematic illustrating the difference between the two sampling techniques used during cell recirculation experiments.** Sampling the recirculating cell suspension for measurements at multiple discrete time points required stopping flow, removing the pump, collecting the sample, replacing the pump and resuming flow until the next time point, at which point the process was repeated for the remaining samples. This differed from continuous flow where flow was only stopped and sampled at the end of the experiment.

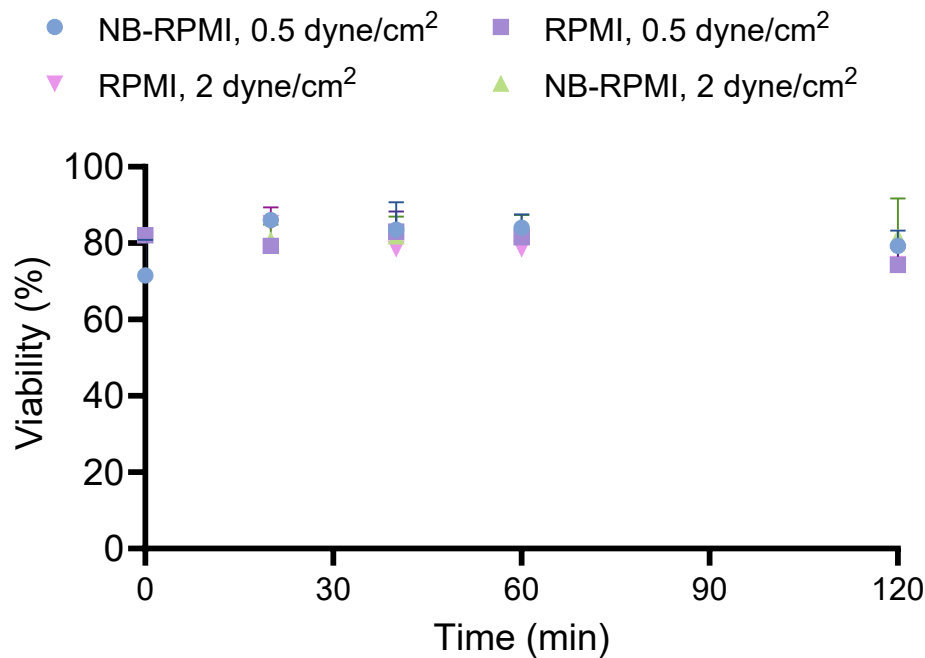

Figure S7. **PBMC viability was stable during 2 h of recirculation through PREDICT96.** The viability of PBMCs recirculated through PREDICT96 was measured at discrete intervals across 2 h. N = 4 devices, mean  $\pm$  standard deviation. PBMC viability was not significantly affected by repeated starting and stopping of the pump during sampling.

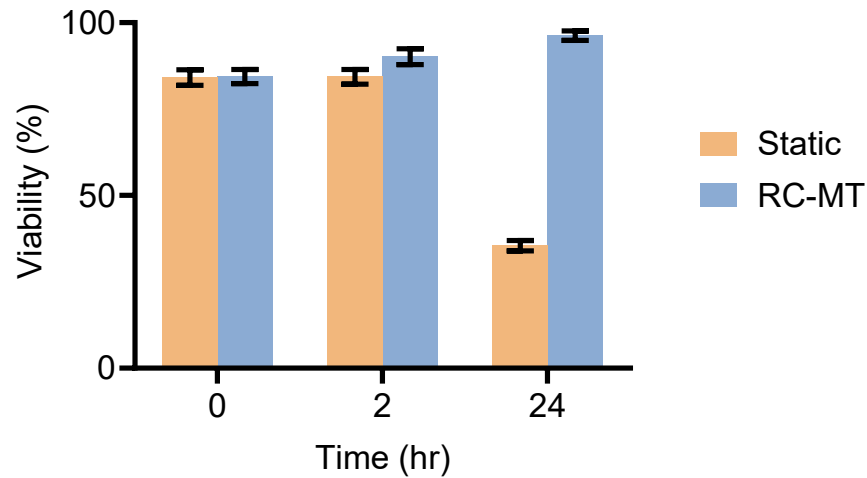

Figure S8. **Viability of monocytes recirculated through PREDICT96 with vascular tissue up to 24 h.** Viability for monocytes suspended in neutrally buoyant media (Lonza and OptiPrep™) under static and recirculating flow (140  $\mu$ L/min) conditions in PREDICT96 operated with the RC-MT pump configuration. Human primary monocytes were isolated from an apheresis product or leukopak and isolated using a negative selection kit (STEMCELL Technologies, StemEasySep Direct Human Monocyte Isolation Kit). Isolated monocytes were cryopreserved using cryopreservation media (STEMCELL Technologies, CryoStor CS10). On the day of experiment, monocytes were thawed and used immediately. Static control: neutrophils suspended with no flow in a well plate. N = 4 devices, mean  $\pm$  standard deviation.

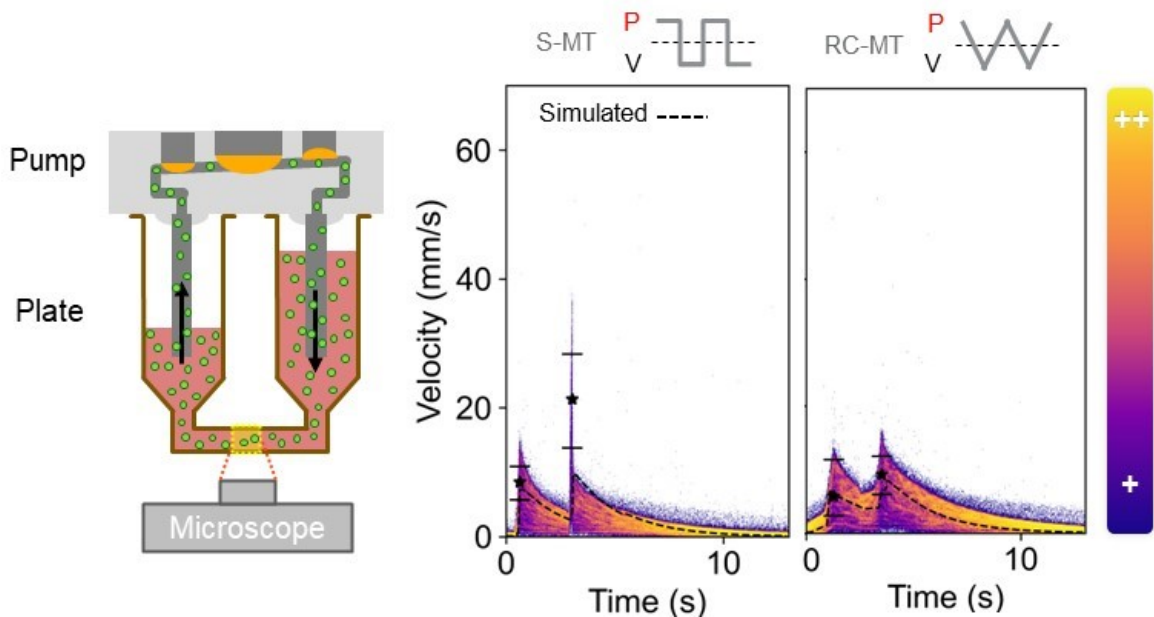

Figure S9. **Simulated and measured tissue model channel flow dynamics for a pressure waveform with reduced amplitude for pump actuation.** The measured and simulated velocity through the plate channel for a pump intake and expulsion cycle using the S-MT and RC-MT pump configuration using a reduced

pressure and vacuum amplitude ( $\pm 2$  psi). The heat maps shows the density of particles with a given velocity.

Table S1. **Neutrophil donor characteristics.** Characteristics of the neutrophil donors and the figures where the donor cells are represented. All blood samples were collected by Charles River Laboratories Cell Solutions, Inc.

| Age | Gender | Height            | Weight              | BMI   | Ethnicity           | ABO/ Rh | Figure   |
|-----|--------|-------------------|---------------------|-------|---------------------|---------|----------|
| 23  | Male   | 6'1"<br>(1.85 m)  | 232 lbs<br>(105 kg) | 30.61 | Caucasian           | O-POS   | 2C-F, 5B |
| 21  | Male   | 6'1"<br>(1.85 m)  | 177 lbs<br>(80 kg)  | 23.35 | Black/White         | O-POS   | 5B       |
| 44  | Female | 5'8"<br>(1.73 m)  | 230 lbs<br>(104 kg) | 34.97 | Caucasian           | O-POS   | 5D       |
| 33  | Male   | 5'8"<br>(1.73 m)  | 235 lbs<br>(107 kg) | 35.73 | Hispanic/<br>Latino | O-POS   | 5, 6A-B  |
| 27  | Female | 5'3"<br>(1.60 m)  | 160 lbs<br>(73 kg)  | 28.34 | Filipino            | O-POS   | 6C-D     |
| 31  | Male   | 5'9"<br>(1.75 m)  | 218 lbs<br>(99 kg)  | 32.19 | Hispanic            | O-POS   | 6C-D     |
| 53  | Male   | 5'10"<br>(1.78 m) | 195 lbs<br>(88 kg)  | 27.98 | Black               | O-POS   | 6C-D     |

Table S2. **Neutrophil flow cytometry panel.** The panel used for neutrophil flow cytometry.

| Neutrophil Purity Panel     |              |         |            |
|-----------------------------|--------------|---------|------------|
| Marker                      | Fluorophore  | Clone   | Catalog #  |
| CD3                         | Pacific Blue | HIT3a   | 300330     |
| CD14                        | PE           | M5E2    | 301806     |
| CD16                        | FITC         | 3G8     | 302006     |
| CD19                        | APC          | 4G7     | 392504     |
| CD45                        | BV711        | H130    | 304050     |
| CD66b                       | PE-Cy7       | G10F5   | 305116     |
| Dead                        | Zombie NIR   | N/A     | 423105     |
| Neutrophil Activation Panel |              |         |            |
| Marker                      | Fluorophore  | Clone   | Catalog #  |
| CD62L                       | Pacific Blue | DREG-56 | 304826     |
| CD45                        | PE           | 2D1     | 368510     |
| CD16                        | FITC         | 3G8     | 302006     |
| CD177                       | APC          | MEM-166 | 315808     |
| CD11b                       | SB702        | ICRF44  | 67-0118-42 |
| CD66b                       | PE-Cy7       | G10F5   | 305116     |
| Dead                        | Zombie NIR   | N/A     | 423105     |



Table S3. **Pump event timing values.** The values used for each parameter in the standard timing (ST) and modified timing (MT) configuration. Refer to Supplemental Figure 1 for details.

|                      | t1 (ms) | t2 (ms) | t3 (ms) | t4 (ms) | t5 (ms) | t6 (ms) | ISD (ms) |
|----------------------|---------|---------|---------|---------|---------|---------|----------|
| Standard Timing (ST) | 100     | 300     | 100     | 100     | 300     | 100     | 4000     |
| Modified Timing (MT) | 50      | 2400    | 50      | 50      | 2400    | 50      | 0        |

Table S4. **Peak dynamic shear in tissue model channels for different pumping configurations.** The peak dynamic shear within microchannels for different pumping configurations.

| Pump Configuration | Peak Dynamic Shear (dyn/cm <sup>2</sup> ) |
|--------------------|-------------------------------------------|
| S-ST               | 13                                        |
| S-MT               | 6.5                                       |
| RC-MT              | 5.7                                       |

Table S5. **Simulated channel velocity shows agreement with measurements across pumping configurations.** The peak velocities of 15  $\mu\text{m}$  fluorescent polystyrene particles recirculated through the PREDICT96 for different pumping configurations. Bold-italicized text indicates the simulated value falls within 1 standard deviation of the measured mean.

| Pressure    | Flow Rate ( $\mu\text{L}/\text{min}$ ) | Connection, Measured Point | Peak          | Simulated (mm/s) | Measured (mm/s) |                |                |
|-------------|----------------------------------------|----------------------------|---------------|------------------|-----------------|----------------|----------------|
|             |                                        |                            |               |                  | Mean            | Pos. Std. Dev. | Neg. Std. Dev. |
| $\pm 2$ psi | 140                                    | RC-MT, Plate               | <i>Intake</i> | <b>9.4</b>       | <b>10.8</b>     | <b>3.3</b>     | <b>-3.5</b>    |
|             |                                        |                            | <i>Expel</i>  | <b>9.8</b>       | <b>12.0</b>     | <b>3.5</b>     | <b>-3.8</b>    |
|             | 55                                     | RC-MT, Plate               | <i>Intake</i> | <b>6.6</b>       | <b>5.8</b>      | <b>5.8</b>     | <b>-3.1</b>    |
|             |                                        |                            | <i>Expel</i>  | <b>8.3</b>       | <b>9.2</b>      | <b>2.9</b>     | <b>-3.2</b>    |
|             |                                        | S-MT, Plate                | <i>Intake</i> | <b>7.3</b>       | <b>8.4</b>      | <b>2.5</b>     | <b>-2.8</b>    |
|             |                                        |                            | Expel         | 9.8              | 21.3            | 7.0            | -7.5           |
| $\pm 6$ psi | 140                                    | RC-MT, Plate               | <i>Intake</i> | <b>13.6</b>      | <b>14.9</b>     | <b>4.7</b>     | <b>-5.4</b>    |
|             |                                        |                            | <i>Expel</i>  | <b>14.6</b>      | <b>20.6</b>     | <b>8.2</b>     | <b>-8.0</b>    |
|             |                                        | S-MT, Plate                | <i>Intake</i> | <b>15.1</b>      | <b>17.7</b>     | <b>5.4</b>     | <b>-5.7</b>    |
|             |                                        |                            | <i>Expel</i>  | <b>16.2</b>      | <b>20.9</b>     | <b>21.3</b>    | <b>-11.0</b>   |
|             | 55                                     | RC-MT, Plate               | <i>Intake</i> | <b>8.9</b>       | <b>7.5</b>      | <b>4.2</b>     | <b>-2.6</b>    |
|             |                                        |                            | Expel         | 13.3             | 20.7            | 5.6            | -6.4           |
|             |                                        | S-MT, Plate                | Intake        | 10.3             | 15.4            | 3.5            | -4.3           |
|             |                                        |                            | <i>Expel</i>  | <b>14.9</b>      | <b>21.9</b>     | <b>24.4</b>    | <b>-14.1</b>   |
|             |                                        | RC-MT, Pump                | <i>Expel</i>  | <b>120</b>       | <b>93.9</b>     | <b>27.3</b>    | <b>-30.3</b>   |
|             |                                        | S-MT, Pump                 | Expel         | 432              | 277.2           | 71.7           | -65.7          |

Video S1. **Neutrophils settling in neutrally buoyant experiments.** Video of neutrophils settling in different density media across 120 minutes.

Video S2. **Neutrophils recirculating through tissue model channels in PREDICT96.** Video of neutrophils flowing through PREDICT96 channel.
